# Supplementary material
Source: publisher site journal article supplement (https://www.dovepress.com/article/272797)
Supplement: Supplementary file 1 [file get_supplementary_file.php]

**
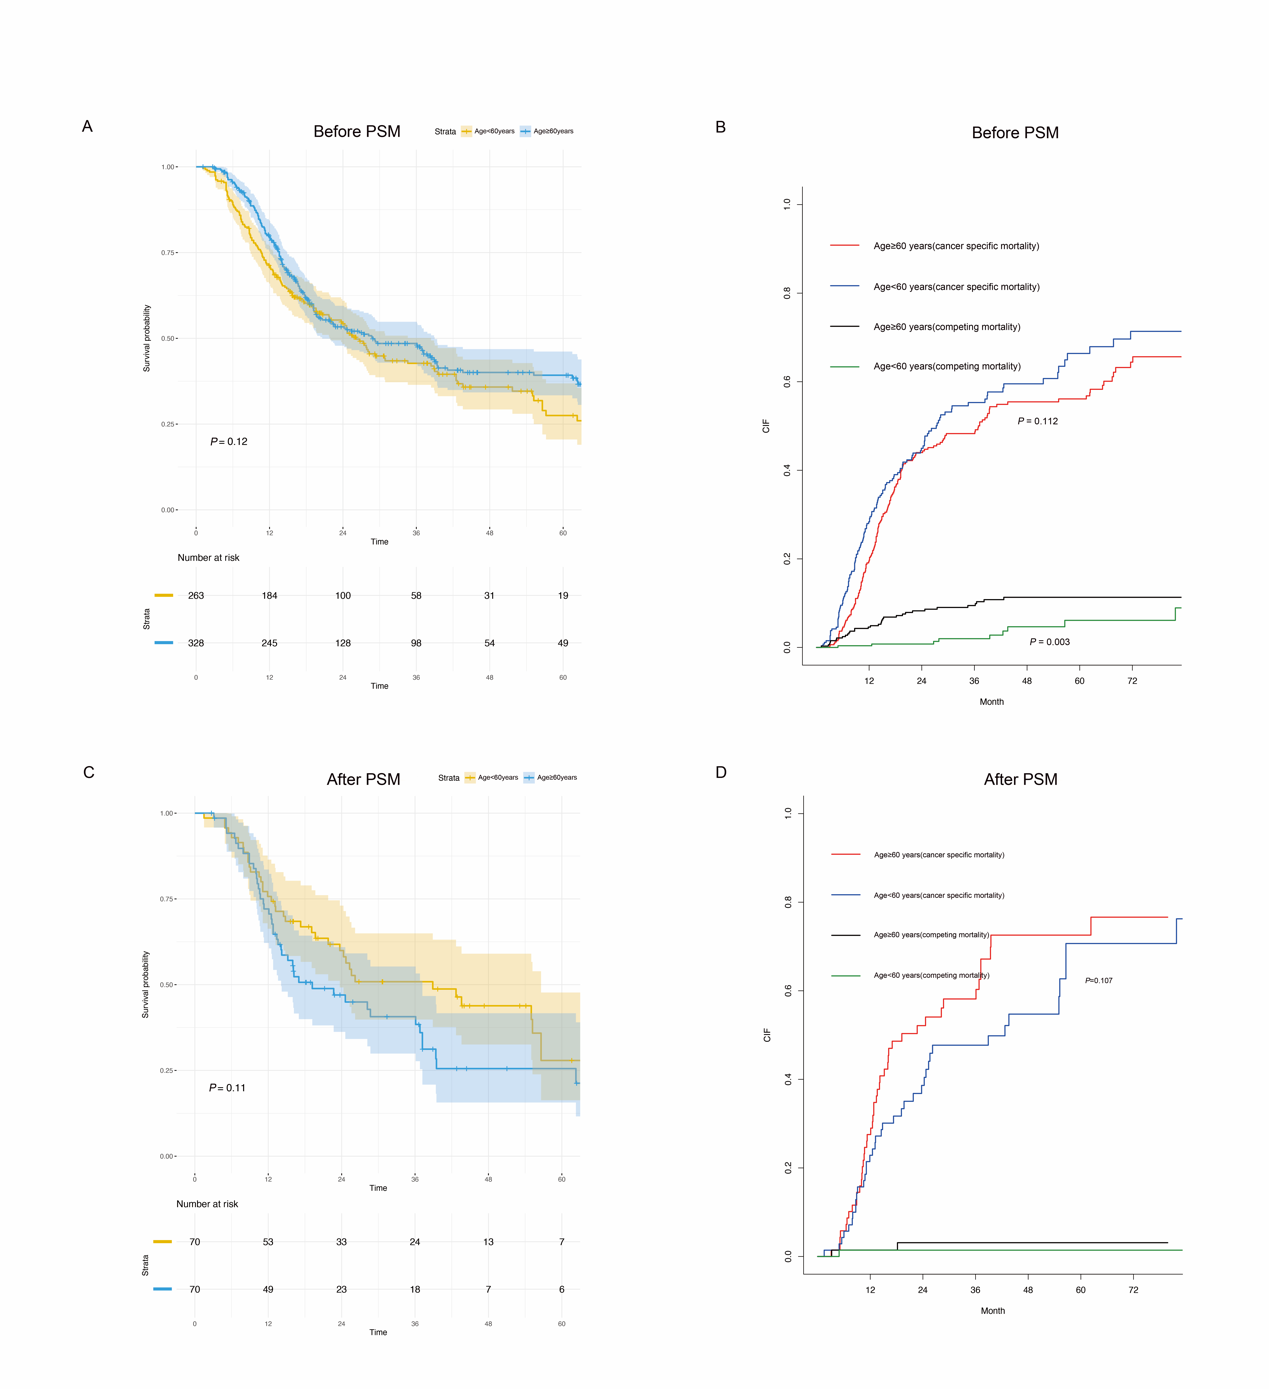
**

**Supplementary Figure. S1.** (**A**) overall survival for the non-elderly group and elderly group before PSM. **(B)** cumulative cancer-specific and competing mortality curves for the non-elderly group and elderly group before PSM. (**C**) overall survival for the non-elderly group and elderly group after PSM. (D) cumulative cancer-specific and competing mortality curves for the non-elderly group and elderly group after PSM.

**Supplementary Table 1.** Clinicopathological characteristics of surgically curative resected iCCA patients between non-elderly groups and elderly groups before PSM and after PSM.

| **variable** | **before matching** | | |  | **after matching** | | |
| --- | --- | --- | --- | --- | --- | --- | --- |
| **≥60years (n=328)** | <**60years (n = 263)** | ***P* value** |  | **≥60years (n=70)** | <**60years (n = 70)** | ***P* value** |
| **Age at diagnosis, median (range), years** | 63(61-68) | 49 (46-55) | <0.001 |  | 63.5(61-68.5) | 42 (38.75-50) | <0.001 |
| **Male sex, n (%)** | 190 (57.9%) | 133 (50.6%) | 0.074 |  | 38 (45.1%) | 38 (52.3%) | 1.000 |
| **HbsAg positive, n (%)** | 111 (33.8%) | 99 (37.6%) | 0.337 |  | 27(38.6%) | 28(40%) | 0.863 |
| **Portal hypertension, n (%)** | 60 (18.3%) | 35 (13.3%) | 0.101 |  | 12 (17.1%) | 12 (17.1%) | 1.000 |
| **Baseline laboratory investigations** |  |  |  |  |  |  |  |
| WBC count ×109/L, median (IQR) | 6.07(5.68-7.60) | 6.46(5.23-8.15) | 0.123 |  | 5.83(4.98-7.55) | 6.80(5.27-8.29) | 0.108 |
| NEUT count ×109/L, median (IQR) | 4.00(3.05-5.36) | 4.22(3.17-5.58) | 0.146 |  | 3.96(2.90-5.12) | 4.52(3.20-6.07) | 0.098 |
| PLT count ×109/L, median (IQR) | 150 (112-203.75) | 176 (125-223) | 0.005 |  | 155(113.75-212.5) | 191.5 (117-209.75) | 0.441 |
| AST (U/L), median (IQR) | 30 (23-38) | 29 (23-38) | 0.401 |  | 28(21-36.5) | 30 (24-37.25) | 0.585 |
| ALT (U/L), median (IQR) | 25 (17-37) | 27 (18-41) | 0.193 |  | 22(16.75-31.25) | 27 (16.75-40.5) | 0.070 |
| GGT (U/L), median (IQR) | 69 (36-125.75) | 67(34-142) | 0.852 |  | 56.5 (32.75-102) | 69 (30-132） | 0.574 |
| TBIL (umol/L), median (IQR) | 10.7 (6.7-14.88) | 12.1(9.5-15.9) | ＜0.001 |  | 9.45(5.63-13.7) | 10.85 (9.2-13.85) | 0.057 |
| ALB (g/L), median (IQR) | 42.25(39.2-45.18) | 42.8(39.7-45.5) | 0.118 |  | 42.25(39.1-45.2) | 41.7(39.63-45.5) | 0.952 |
| PT(s), median (IQR) | 11.6(11.1-12.3) | 11.6(10.9-12.3) | 0.500 |  | 11.65(11-12.33) | 11.7(11.18-12.6) | 0.568 |
| INR, median (IQR) | 1.02(0.97-1.09) | 1.02(0.96-1.07) | 0.255 |  | 1.01(0.95-1.08) | 1.03(0.97-1.09) | 0.302 |
| CA19-9 level(U/mL), median (IQR) | 66.07 (18.86-411.28) | 51.04 (15.9-661.8) | 0.840 |  | 71.98 (25.1-431.3) | 44.60 (14.08-376.33) | 0.138 |
| **PNI** |  |  | 0.536 |  |  |  | 0.654 |
| ≥45 | 268(81.7%) | 220(83.7%) |  |  | 57(81.4%) | 59(84.3%) |  |
| ＜45 | 60(18.3%) | 43(16.3%) |  |  | 13(18.6%) | 11(15.7%) |  |
| **Tumor location, n (%)** |  |  | 0.652 |  |  |  | 0.367 |
| Right lobe | 128(39%) | 110(41.8%) |  |  | 32 (45.7%) | 26 (37.1%) |  |
| Left lobe | 127(38.7%) | 102(38.8%) |  |  | 28(40%) | 28 (40%) |  |
| Both lobes | 73(22.3%) | 51 (19.4%) |  |  | 10 (14.3%) | 16 (22.9%) |  |
| **Maximum tumor size, cm** | 5.4(3.9-7.2) | 6(4.2-8) | 0.097 |  | 5.25(3.98-6.8) | 5.6(3.98-7.85) | 0.469 |
| **Tumor number, n, (%)** |  |  | 0.227 |  |  |  | 0.280 |
| Solitary | 231 (70.4%) | 173 (65.8%) |  |  | 50 (71.4%) | 44 (62.9%) |  |
| Multiple | 97 (29.6%) | 90 (34.2%) |  |  | 20 (28.6%) | 26 (37.1%) |  |
| **Hepatic capsule, n, (%)** |  |  | 0.063 |  |  |  | 0.495 |
| incomplete | 172(52.4%) | 158(60.1%) |  |  | 38 (54.3%) | 42 (60%) |  |
| complete | 156(47.6%) | 105(39.9%) |  |  | 32 (45.7%) | 28 (40%) |  |
| **MVI, n, (%)** |  |  | 0.580 |  |  |  | 0.284 |
| Yes | 65 (19.8%) | 57(21.7%) |  |  | 11(15.7%) | 16(22.9%) |  |
| No | 263 (80.2%) | 206(78.3%) |  |  | 59 (84.3%) | 54 (77.1%) |  |
| **Macroscopic vascular invasion, n, (%)** |  |  | 0.048 |  |  |  | 0.708 |
| Yes | 97 (29.6%) | 98 (37.3%) |  |  | 21(30%) | 19 (27.1%) |  |
| No | 231 (70.4%) | 165 (62.7%) |  |  | 49 (70%) | 51 (72.9%) |  |
| **Satellite nodules, n, (%)** |  |  | 0.136 |  |  |  | 0.237 |
| Yes | 44(13.4%) | 47 (17.9%) |  |  | 8 (11.4%) | 13 (18.6%) |  |
| No | 284 (86.6%) | 216 (82.1%) |  |  | 62 (88.6%) | 57 (81.4%) |  |
| **Lymph node metastasis, n, (%)** |  |  | 0.150 |  |  |  | 0.421 |
| Yes | 80 (24.4%) | 78 (29.7%) |  |  | 14(20%) | 18(25.7%) |  |
| No | 248 (75.6%) | 185 (70.3%) |  |  | 56(80%) | 52(74.3%) |  |
| **Extent of liver resection, n, (%)** |  |  | 0.111 |  |  |  | 0.735 |
| Major | 163 (49.7%) | 148 (56.3%) |  |  | 33 (48.8%) | 35 (50%) |  |
| Minor | 165 (50.3%) | 115 (43.7%) |  |  | 47 (51.2%) | 35 (50%) |  |
| **Operation approach, n, (%)** |  |  | 0.294 |  |  |  | 0.075 |
| LLR group | 30 (9.1%) | 31 (11.8%) |  |  | 19 (27.1%) | 29 (41.4%) |  |
| OLR group | 298 (90.9%) | 232 (88.2%) |  |  | 51 (72.9%) | 41 (58.6%) |  |
| **Complication, Clavien-Dindo ≥3, n (%)** |  |  | 0.040 |  |  |  | 0.796 |
| Yes | 42(12.8%) | 20(7.6%) |  |  | 8(11.4%) | 9(12.9%) |  |
| No | 286(87.2%) | 243(92.4%) |  |  | 62(88.6%) | 61(87.1%) |  |

**Abbreviations:** *HBsAg* hepatitis B surface antigen; *WBC* white blood cell; *NEU* neutrophil; *PLT* platelet; *ALT* alanine aminotransferase; *AST* aspartate transaminase; *GGT* γ-glutamyl transferase; *TBIL* total bilirubin; *ALB* albumin; *PT* Prothrombin time; *INR* international normalized ratio; *CA19-9* carbohydrate antigen 19-9; *PNI* Prognostic Nutritional Index; *MVI* microvascular invasion; *LLR* laparoscopic liver resection; *OLR* open liver resection;

**Supplementary Table 2.** Univariate and Multivariate Cox analysis on the overall survival of all elderly iCCA patients (N=230) in the training set.

| **Overall survival** | **Univariate Analysis** | | |  | **Multivariate Analysis** | | |
| --- | --- | --- | --- | --- | --- | --- | --- |
| **Variable** | **Hazard Ratio** | **95% CI** | ***P* value** |  | **Hazard Ratio** | **95% CI** | ***P* value** |
| Age (≥70 vs. <70 years) | 1.249 | 0.833-1.873 | 0.281 |  | **1.706** | **1.101-2.645** | **0.017** |
| Sex (female vs. male) | 0.908 | 0.644-1.279 | 0.580 |  | 0.959 | 0.673-1.367 | 0.817 |
| HbsAg (positive vs. negative) | 1.072 | 0.754-1.524 | 0.699 |  |  |  |  |
| Portal hypertension (present vs. absent) | 0.838 | 0.547-1.285 | 0.418 |  |  |  |  |
| CA19-9 (>79 vs. ≤79 U/mL) | **1.741** | **1.243-2.438** | **0.001** |  | 1.332 | 0.941-1.886 | 0.106 |
| Maximum tumor size (>5 vs. ≤5cm) | **1.472** | **1.048-2.066** | **0.026** |  | 0.982 | 0.685-1.408 | 0.922 |
| Tumor number (multiple vs. single) | **1.661** | **1.172-2.354** | **0.004** |  | 1.314 | 0.902-1.914 | 0.154 |
| Tumor encapsulation (incomplete vs. complete) | **1.451** | **1.033-2.039** | **0.032** |  | 1.188 | 0.830-1.702 | 0.346 |
| MVI (yes vs. no) | **2.151** | **1.448-3.196** | **＜0.001** |  | **1.699** | **1.093-2.641** | **0.019** |
| Macroscopic vascular invasion (yes vs. no) | **2.999** | **2.124-4.234** | **＜0.001** |  | **2.398** | **1.648-3.489** | **＜0.001** |
| Satellite nodules (yes vs. no) | 1.176 | 0.714-1.936 | 0.524 |  |  |  |  |
| Lymph node metastasis (yes vs. no) | **4.336** | **3.005-6.257** | **＜0.001** |  | **4.059** | **2.733-6.028** | **＜0.001** |
| Extent of liver resection (major vs. minor) | 1.225 | 0.876-1.713 | 0.237 |  |  |  |  |
| Surgical approach (LLR vs. OLL) | 1.246 | 0.729-2.130 | 0.422 |  |  |  |  |

**Abbreviations:** *CI* confidence interval; *HBsAg* hepatitis B surface antigen; *CA19-9* carbohydrate antigen 19-9; *MVI* microvascular invasion; *LLR* laparoscopic liver resection; *OLR* open liver resection;

**Bold indicates statistically significant difference.**
